# Supplementary material for: Effects of Individual Health Topic Familiarity on Activity Patterns During Health Information Searches
Source: PubMed Central journal article supplement (PMC4381811; doi:10.2196/medinform.3803), 2015-03-17
Supplement: medinform_v3i1e16_app1.pdf [file medinform_v3i1e16_app1.pdf]

# Multimedia Appendix 1 Health Terminology Familiarity

## Survey

### Section 1

#### Instruction

For each item below, check one option that is **most closely related** to the *italic* word. If you never heard the *italic* word/phrase before, please do not guess the answer and instead **select the unknown** option.

- |                                            |                                  |
|--------------------------------------------|----------------------------------|
| 1. <i>Eczema</i>                           | First aid medical device         |
| Skin Inflammation                          | Medical measurement device       |
| Broken bone                                | Surgical instrument              |
| Stomach problem                            | Body scanner device              |
| Movement Disorder                          | Unknown                          |
| Unknown                                    |                                  |
| 2. <i>Topical ointment</i>                 | 5. <i>Urinalysis</i>             |
| Protein                                    | Disease                          |
| Hormone                                    | Medical test                     |
| Surgery                                    | Hormone                          |
| Medicine                                   | Enzyme                           |
| Unknown                                    | Unknown                          |
| 3. <i>Heart attack</i>                     | 6. <i>Urine specific gravity</i> |
| Heart and blood vessel disease             | pH test                          |
| Digestive system disease                   | Concentration test               |
| Kidney disease                             | Protein test                     |
| Endocrine disease                          | Glucose test                     |
| Unknown                                    | Unknown                          |
| 4. <i>Automated External Defibrillator</i> | 7. <i>Cholesterol</i>            |
|                                            | Food allergy                     |
|                                            | Fat substance                    |

|    |                    |                    |
|----|--------------------|--------------------|
|    | Disease            | Surgical procedure |
|    | Protein            | Detoxification     |
|    | Unknown            | Vaccine            |
| 8. | <i>Simvastatin</i> | Oral medication    |
|    |                    | Unknown            |

## Section 2

### Instruction

Select the correct answer for each question below.

If you never heard the *italic* word/phrase before, please do not guess the answer and instead **select the unknown** option.

1. If you are diagnosed with *eczema*, it means that ...
  - your skin shows patches of itchy, redness, and thickened area
  - you have a broken bone in your wrist
  - the inside lining of your stomach is wounded
  - your tendon or muscle in the knee joint is injured
  - Unknown
  
2. A *topical ointment* is ...
  - a type of protein for building muscle tissue and repairing damaged tissues
  - a body chemical that responds to allergy or infection
  - a diagnostic test involving the removal of sample tissue
  - a type medication that is applied to the skin to reduce the inflammation
  - Unknown
  
3. You frequently find brochures in the clinic or hospital about how to recognize a *heart attack*. To you heart attack means ...
  - the heart suddenly stops beating unexpectedly
  - the artery that carries blood to the heart is blocked
  - heartbeat rhythm problem, the heart may beat too fast, too slow, or too irregularly
  - a damage to the heart muscle
  - Unknown
  
4. The medical kit box (AED) as in the picture below is located in many public places. This kit is used to ...

deliver electric shocks to a patient's heart in

a sudden heartbeat stop incident

measure blood sugar level

filter harmful waste, salt, and excess fluid from the blood

determine the severity of injuries by scanning the affected body

parts

Unknown

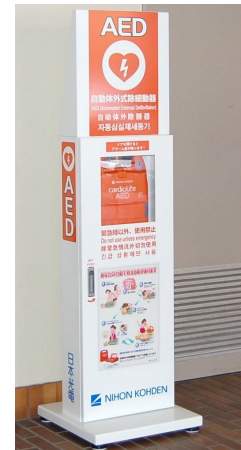

5. *Urinalysis* refers to ...
- disorder in the kidney and urine tract system
  - medical test that examines the physical, chemical, and microscopic properties of urine
  - hormone system that regulates the balance of blood pressure and water
  - enzyme that breaks down protein into smaller particle, e.g. amino acid
  - Unknown
6. *Urine density test* measures ...
- the level of acid in a urine
  - the concentration of substances in a urine
  - the excess amount of protein found in a urine sample
  - the amount of sugar found in a urine sample
  - Unknown
7. Too much *bad cholesterol* in the blood is dangerous because ...
- it may damage liver
  - it leads to kidney stone formation within the kidney or in the urinary tract
  - it can obstruct the absorption of good nutrients in the small intestine
  - it leads to artery blockage and increases heart attack risk
  - Unknown
8. *Simvastatin* is mainly prescribed for ...
- reducing total cholesterol level
  - the treatment of mild to moderate pain, inflammation and fever
  - lowering blood pressure level
  - the treatment of nasal congestion and runny nose from allergy
  - Unknown

## Section 3

### Instruction

Select the correct answer for each question below.

If you never heard the *italic* word/phrase before, please do not guess the answer and instead **select the unknown** option.

1. If you are diagnosed with *atopic dermatitis*, it means that ...

  - the inside lining of your stomach is wounded
  - your skin shows patches of itchy, redness, and thickened area
  - your tendon or tissue in the knee joint is injured
  - you have fracture(s) in your wrist
  - Unknown
2. A *topical corticosteroid* is ...

  - a type of protein for building muscle tissue and repairing damaged tissues
  - a body chemical that responds to allergy or infection
  - a diagnostic test that involves taking a sample of tissue for an examination under a microscope
  - a type of drug to reduce inflammation and thickening of the skin
  - Unknown
3. You frequently find brochures in the clinic or hospital about how to recognize a *myocardial infarction (MI)*. MI means ...

  - a heart condition in which the heart suddenly and unexpectedly stops beating
  - a blockage in the artery that carries blood to the heart
  - heartbeat rhythm problem, the heart may beat too fast, too slow, or too irregularly
  - a damage to the heart muscle
  - Unknown
4. An Automated External Defibrillator is a portable device to ...

  - deliver electric shocks to a patient's heart in a sudden cardiac arrest incident
  - measure the approximate concentration of glucose in the blood
  - filter harmful waste, salt, and excess fluid from the blood
  - determine the severity of injuries by scanning the affected body parts
  - Unknown

5. *Routine and Microscopy (R&M)* refers to ...
  - disorder in the kidney and urine tract system
  - medical test that examines the physical, chemical, and microscopic properties of urine
  - hormone system that regulates the balance of blood pressure and water
  - enzyme that breaks down protein into smaller particle, e.g. amino acid
  - Unknown
  
6. *Urine specific gravity measures ...*
  - how acidic or alkaline the urine is
  - the concentration of all chemical particles in the urine
  - the excess amount of protein found in a urine sample
  - the amount of glucose found in a urine sample
  - Unknown
  
7. High level of *low-density lipoprotein* may cause ...
  - damage to the liver
  - the formation of kidney stone within the kidney or in the urinary tract
  - disorder in small intestine function to absorb good nutrients from food
  - artery blockage that can increase coronary disease risk
  - Unknown
  
8. *Statins or HMG COa Reductase Inhibitors* are drugs used to ...
  - reduce blood cholesterol level
  - treat mild to moderate pain, inflammation and fever
  - lower blood pressure level
  - relieve nasal congestion and reduce the symptoms of an allergic reaction
  - Unknown
