# Supplementary material for: Effects of Individual Health Topic Familiarity on Activity Patterns During Health Information Searches
Source: PubMed Central journal article supplement (PMC4381811; doi:10.2196/medinform.3803), 2015-03-17
Supplement: medinform_v3i1e16_app2.pdf [file medinform_v3i1e16_app2.pdf]

## Multimedia Appendix 2 Frequency and Proportion of Search Activity Type

| Search Activity Type | Frequency ( <i>N</i> ) |      |     | Proportion (%) |        |       |
|----------------------|------------------------|------|-----|----------------|--------|-------|
|                      | L1                     | L2   | L3  | L1             | L2     | L3    |
| Q-AccSE              | 196                    | 115  | 83  | 8.09           | 9.55   | 8.6   |
| Q-AccHW              | 4                      | 2    | 12  | 0.17           | 0.17   | 1.2   |
| Q-NewQ               | 78                     | 65   | 57  | 3.22           | 5.40   | 5.9   |
| Q-ModQ               | 162                    | 75   | 48  | 6.68           | 6.23   | 5.0   |
| E-ExamSR             | 298                    | 170  | 131 | 12.29          | 14.12  | 13.6  |
| E-DisSR              | 34                     | 19   | 10  | 1.40           | 1.58   | 1.0   |
| E-Evall              | 565                    | 260  | 208 | 23.31          | 21.59  | 21.5  |
| E-FindQ              | 21                     | 15   | 9   | 0.87           | 1.25   | 0.9   |
| A-SelHI              | 295                    | 159  | 158 | 12.17          | 13.21  | 16.3  |
| A-SelGI              | 107                    | 52   | 27  | 4.41           | 4.32   | 2.8   |
| A-AccF               | 129                    | 34   | 28  | 5.32           | 2.82   | 2.9   |
| A-AccB               | 72                     | 28   | 10  | 2.97           | 2.33   | 1.0   |
| U-UseHI              | 139                    | 107  | 96  | 5.73           | 8.89   | 9.9   |
| U-UseGI              | 38                     | 17   | 8   | 1.57           | 1.41   | 0.8   |
| D-DisHI              | 187                    | 47   | 57  | 7.71           | 3.90   | 5.9   |
| D-DisGI              | 59                     | 26   | 17  | 2.43           | 2.16   | 1.8   |
| D-UnchkHI            | 28                     | 7    | 5   | 1.16           | 0.58   | 0.5   |
| D-UnchkGI            | 12                     | 6    | 3   | 0.50           | 0.50   | 0.3   |
| Total                | 2424                   | 1204 | 967 | 100.00         | 100.00 | 100.0 |
