# Supplementary material for: Effects of Individual Health Topic Familiarity on Activity Patterns During Health Information Searches
Source: PubMed Central journal article supplement (PMC4381811; doi:10.2196/medinform.3803), 2015-03-17
Supplement: medinform_v3i1e16_app3.pdf [file medinform_v3i1e16_app3.pdf]

## Multimedia Appendix 3 Most Frequent 5-gram Sequence Patterns in Each Familiarity Group

Top 20 frequent 5-gram sequence patterns in group L1

| Rank | Pattern                                      | Occurrence<br>Frequency | Percentage<br>(%) <sup>a</sup> |
|------|----------------------------------------------|-------------------------|--------------------------------|
| 1    | A:AccSE A:ModQ E:ExamSR A:SelHI<br>E:Evall   | 55                      | 5.8                            |
| 2    | E:Evall D:DisHI A:AccSE A:ModQ<br>E:ExamSR   | 35                      | 3.7                            |
| 3    | A:ModQ E:ExamSR A:SelHI E:Evall<br>U:UseHI   | 27                      | 2.9                            |
| 4    | E:Evall D:DisHI E:ExamSR A:SelHI<br>E:Evall  | 26                      | 2.8                            |
| 5    | A:ModQ E:ExamSR A:SelHI E:Evall<br>D:DisHI   | 24                      | 2.6                            |
| 6    | D:DisHI A:AccSE A:ModQ E:ExamSR<br>A:SelHI   | 23                      | 2.4                            |
| 7    | E:Evall U:UseHI A:AccSE A:ModQ<br>E:ExamSR   | 23                      | 2.4                            |
| 8    | E:Evall A:XplorF E:Evall A:XplorF<br>E:Evall | 22                      | 2.3                            |
| 9    | E:Evall D:DisHI E:Evall D:DisHI<br>E:Evall   | 22                      | 2.3                            |
| 10   | E:ExamSR A:SelHI E:Evall D:DisHI<br>A:AccSE  | 22                      | 2.3                            |
| 11   | E:ExamSR A:SelHI E:Evall D:DisHI<br>E:ExamSR | 21                      | 2.2                            |
| 12   | A:SelHI E:Evall D:DisHI A:AccSE<br>A:ModQ    | 20                      | 2.1                            |
| 13   | A:SelHI E:Evall D:DisHI E:ExamSR<br>A:SelHI  | 18                      | 1.9                            |
| 14   | A:AccSE A:NewQ E:ExamSR A:SelHI<br>A:SelHI   | 17                      | 1.8                            |
| 15   | E:ExamSR A:SelHI E:Evall U:UseHI             | 17                      | 1.8                            |

| Rank. | Pattern                                     | Occurrence Frequency | Percentage (%) <sup>a</sup> |
|-------|---------------------------------------------|----------------------|-----------------------------|
|       | A:AccSE                                     |                      |                             |
| 16    | A:SelHI E:EvalI U:UseHI A:AccSE<br>A:ModQ   | 17                   | 1.8                         |
| 17    | D:DisHI E:ExamSR A:SelHI E:EvalI<br>D:DisHI | 16                   | 1.7                         |
| 18    | U:UseHI A:AccSE A:ModQ E:ExamSR<br>A:SelHI  | 16                   | 1.7                         |
| 19    | A:AccSE A:NewQ E:ExamSR A:SelHI<br>E:EvalI  | 15                   | 1.6                         |
| 20    | A:ModQ E:ExamSR E:DisSR A:ModQ<br>E:ExamSR  | 15                   | 1.6                         |
|       | Total Top 20 frequent patterns              | 451                  | 48.0                        |

<sup>a</sup> Total number of all 5-gram sequences = 940

Top 20 frequent 5-gram sequence patterns in group L2

| Ran<br>k. | Pattern                                     | Occurrence<br>Frequency | Percentage<br>(%) <sup>a</sup> |
|-----------|---------------------------------------------|-------------------------|--------------------------------|
| 1         | A:AccSE A:ModQ E:ExamSR A:SelHI<br>E:EvalI  | 24                      | 5.4                            |
| 2         | E:EvalI U:UseHI A:AccSE A:ModQ<br>E:ExamSR  | 24                      | 5.4                            |
| 3         | A:ModQ E:ExamSR A:SelHI E:EvalI<br>U:UseHI  | 23                      | 5.2                            |
| 4         | A:AccSE A:NewQ E:ExamSR A:SelHI<br>E:EvalI  | 21                      | 4.7                            |
| 5         | U:UseHI A:AccSE A:ModQ E:ExamSR<br>A:SelHI  | 21                      | 4.7                            |
| 6         | E:ExamSR A:SelHI E:EvalI U:UseHI<br>A:AccSE | 20                      | 4.5                            |
| 7         | A:SelHI E:EvalI U:UseHI A:AccSE<br>A:ModQ   | 17                      | 3.8                            |
| 8         | A:NewQ E:ExamSR A:SelHI E:EvalI<br>U:UseHI  | 16                      | 3.6                            |
| 9         | A:AccSE A:NewQ E:ExamSR A:SelHI<br>A:SelHI  | 13                      | 2.9                            |
| 10        | A:AccSE A:ModQ E:ExamSR A:SelHI<br>A:SelHI  | 10                      | 2.3                            |
| 11        | A:AccSE A:NewQ E:ExamSR A:SelGI<br>E:EvalI  | 10                      | 2.3                            |
| 12        | E:ExamSR E:DisSR A:ModQ<br>E:ExamSR A:SelHI | 10                      | 2.3                            |
| 13        | E:ExamSR A:SelHI A:SelHI E:EvalI<br>E:EvalI | 10                      | 2.3                            |
| 14        | A:ModQ E:ExamSR E:DisSR A:ModQ<br>E:ExamSR  | 9                       | 2.0                            |
| 15        | E:ExamSR A:SelHI A:SelHI A:SelHI<br>E:EvalI | 8                       | 1.8                            |
| 16        | A:ModQ E:ExamSR A:SelGI E:EvalI<br>D:DisGI  | 8                       | 1.8                            |
| 17        | A:ModQ E:ExamSR A:SelHI E:EvalI<br>D:DisHI  | 8                       | 1.8                            |
| 18        | A:NewQ E:ExamSR A:SelHI A:SelHI             | 8                       | 1.8                            |

| Rank | Pattern                         | Occurrence Frequency | Percentage (%) <sup>a</sup> |
|------|---------------------------------|----------------------|-----------------------------|
|      | E:Evall                         |                      |                             |
| 19   | A:AccSE A:ModQ E:ExamSR E:DisSR | 7                    | 1.6                         |
|      | A:ModQ                          |                      |                             |
| 20   | A:AccSE A:ModQ E:ExamSR A:SelGI | 7                    | 1.6                         |
|      | E:Evall                         |                      |                             |
|      | Total Top 20 frequent patterns  | 274                  | 61.8                        |

<sup>a</sup> Total number of all 5-gram sequences = 444

Top 20 frequent 5-gram sequence patterns in group L3

| Ran<br>k. | Pattern                                      | Occurrence<br>Frequency | Percentage<br>(%) <sup>a</sup> |
|-----------|----------------------------------------------|-------------------------|--------------------------------|
| 1         | A:AccSE A:NewQ E:ExamSR A:SelHI<br>E:EvalI   | 18                      | 5.0                            |
| 2         | A:AccSE A:ModQ E:ExamSR A:SelHI<br>E:EvalI   | 17                      | 4.7                            |
| 3         | A:NewQ E:ExamSR A:SelHI E:EvalI<br>U:UseHI   | 16                      | 4.5                            |
| 4         | E:EvalI D:DisHI A:AccSE A:ModQ<br>E:ExamSR   | 12                      | 3.3                            |
| 5         | A:ModQ E:ExamSR A:SelHI E:EvalI<br>U:UseHI   | 11                      | 3.1                            |
| 6         | A:AccSE A:NewQ E:ExamSR A:SelHI<br>A:SelHI   | 10                      | 2.8                            |
| 7         | E:ExamSR A:SelHI E:EvalI U:UseHI<br>E:ExamSR | 10                      | 2.8                            |
| 8         | E:ExamSR A:SelHI A:SelHI A:SelHI<br>E:EvalI  | 10                      | 2.8                            |
| 9         | U:UseHI A:AccSE A:ModQ E:ExamSR<br>A:SelHI   | 10                      | 2.8                            |
| 10        | D:DisHI A:AccSE A:ModQ E:ExamSR<br>A:SelHI   | 9                       | 2.5                            |
| 11        | E:EvalI U:UseHI A:AccSE A:ModQ<br>E:ExamSR   | 9                       | 2.5                            |
| 12        | E:ExamSR A:SelHI E:EvalI D:DisHI<br>A:AccSE  | 9                       | 2.5                            |
| 13        | A:SelHI E:EvalI D:DisHI A:AccSE<br>A:ModQ    | 9                       | 2.5                            |
| 14        | A:SelHI E:EvalI U:UseHI A:AccSE<br>A:ModQ    | 9                       | 2.5                            |
| 15        | A:SelHI E:EvalI U:UseHI E:ExamSR<br>A:SelHI  | 9                       | 2.5                            |
| 16        | A:AccHW A:NewQ E:ExamSR A:SelHI<br>E:EvalI   | 8                       | 2.2                            |
| 17        | E:ExamSR A:SelHI E:EvalI A:XplorF<br>E:EvalI | 8                       | 2.2                            |
| 18        | E:ExamSR A:SelHI E:EvalI U:UseHI             | 8                       | 2.2                            |

| Rank. | Pattern                         | Occurrence Frequency | Percentage (%) <sup>a</sup> |
|-------|---------------------------------|----------------------|-----------------------------|
|       | A:AccSE                         |                      |                             |
| 19    | A:AccSE A:ModQ E:ExamSR A:SelHI | 7                    | 2.0                         |
|       | A:SelHI                         |                      |                             |
| 20    | A:SelHI A:SelHI E:EvalI D:DisHI | 7                    | 2.0                         |
|       | E:EvalI                         |                      |                             |
|       | Total Top 20 frequent patterns  | 206                  | 57.4                        |

<sup>a</sup> Total number of all 5-gram sequences = 359
